# Supplementary material for: Magnetic Prussian blue nanoparticles for combined enzyme-responsive drug release and photothermal therapy
Source: Royal Society of Chemistry journal article supplement (doi:10.1039/c5ra01616a), 2015-01-01
Supplement: c5ra01616a1.pdf [file c5ra01616a1.pdf]

## Supplementary Information

### **Magnetic Prussian blue nanoparticles for combined enzyme-responsive drug release and photothermal therapy**

Peng Xue<sup>#,a</sup>, Jingnan Bao<sup>#,b</sup>, Yafeng Wu<sup>a</sup>, Yilei Zhang<sup>\*,b</sup>, Yuejun Kang<sup>\*,a</sup>

<sup>a</sup> 62 Nanyang Drive, School of Chemical and Biomedical Engineering, Nanyang Technological University, Singapore, 637459. E-mail: yuejun.kang@ntu.edu.sg; Tel: (+65) 6316 2894; Fax: (+65) 6794 7553

<sup>b</sup> 50 Nanyang Avenue, School of Mechanical & Aerospace Engineering, Nanyang Technological University, Singapore, 639798. E-mail: ylzhang@ntu.edu.sg; Tel: (+65) 6790 5952; Fax: (+65) 6792 4062

\*To whom correspondence should be addressed

#These authors contributed equally to this work

## Additional Figures

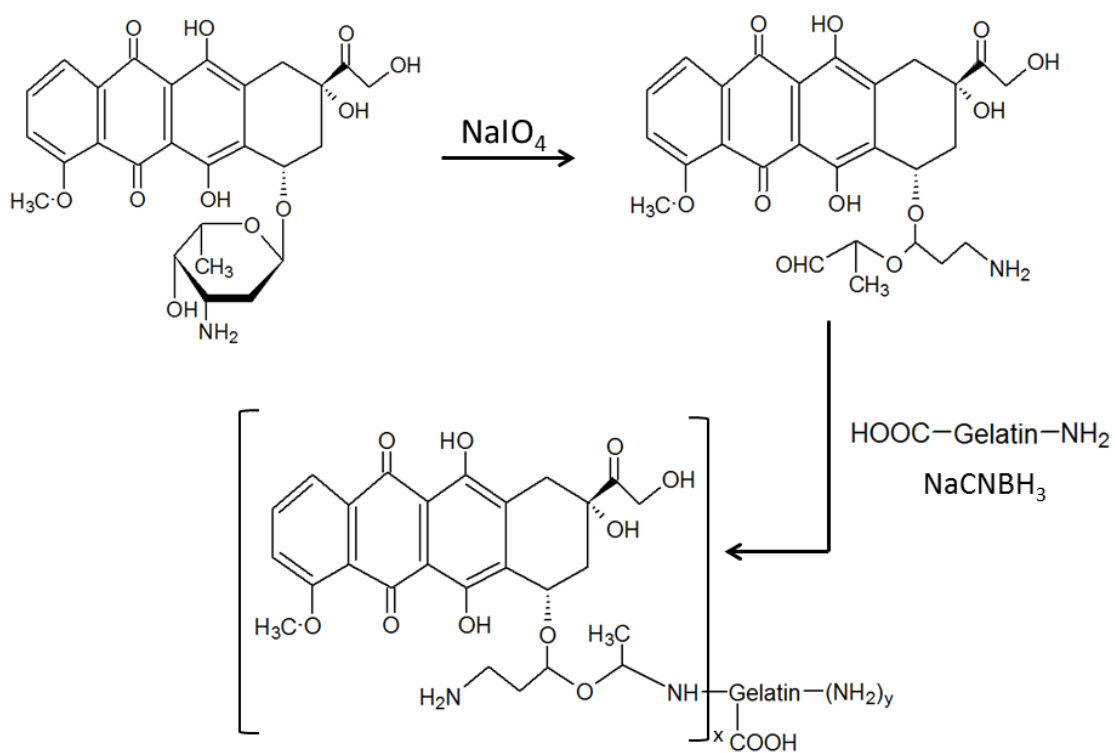

**Scheme S1.** Synthesis of gelatin-DOX conjugates based on a standard periodate oxidation method.

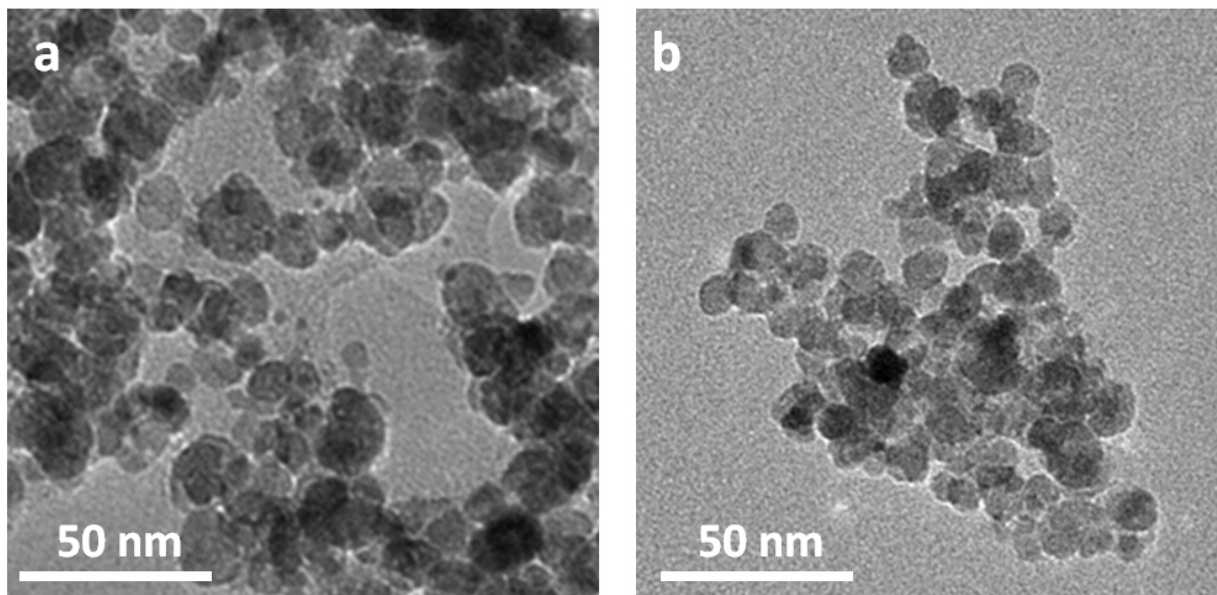

**Figure S1.** Comparison of  $\text{Fe}_3\text{O}_4@PB@Gel-DOX$  NPs (a) and pure  $\text{Fe}_3\text{O}_4$  NPs (b) measured by transmission electron microscopy (TEM).

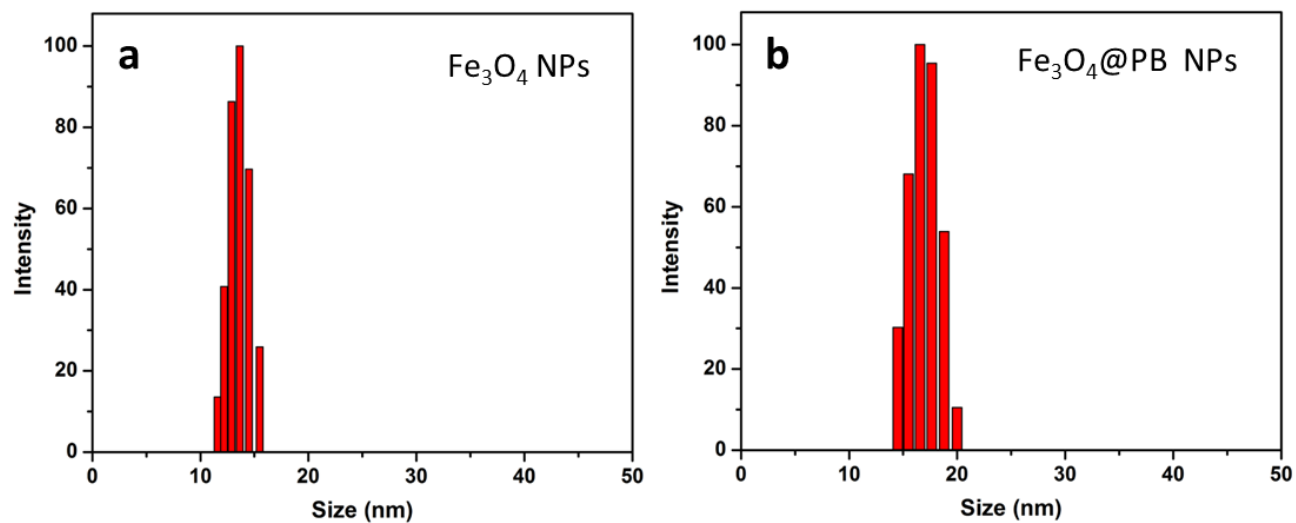

**Figure S2.** Size distribution of Fe<sub>3</sub>O<sub>4</sub> NPs (a) and Fe<sub>3</sub>O<sub>4</sub>@PB NPs (b) measured by dynamic light scattering (DLS).
